# Supplementary material for: P2X7 receptor antagonist delivery vehicle based on photocrosslinked amphiphilic hybrid gels
Source: Royal Society of Chemistry journal article supplement (doi:10.1039/c8ra01460d), 2018-01-01
Supplement: c8ra01460d3.pdf [file c8ra01460d3.pdf]

# P2X7 Receptor Antagonist delivery vehicle based on photocrosslinked amphiphilic hybrid gels

Derya Aydin and Seda Kizilel\*

Department of Chemical and Biological Engineering, Koc University, Sariyer, Istanbul, Turkey, 34450

\*E-mail: [skizilel@ku.edu.tr](mailto:skizilel@ku.edu.tr)

Fax: [+90-212-338-1548](tel:+90-212-338-1548)

## SUPPLEMENTARY INFORMATION

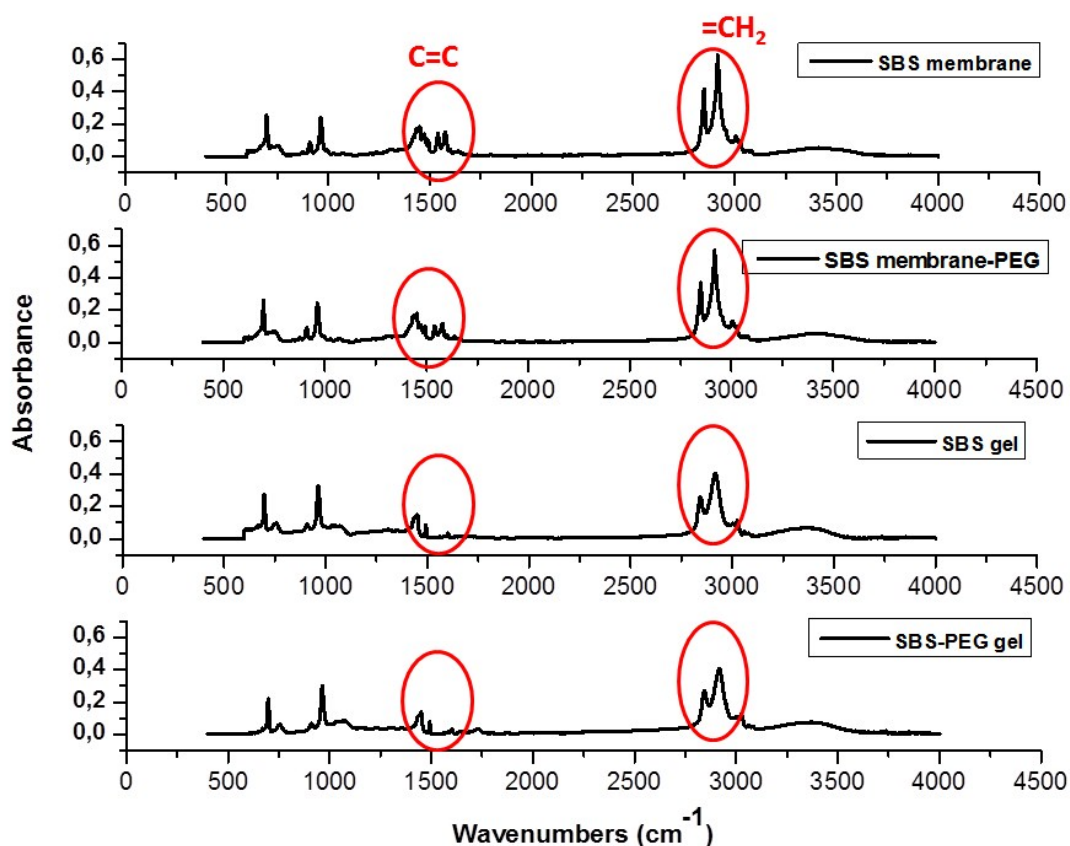

Figure S1. FTIR spectra of SBS membrane, SBS membrane-PEG, SBS gel and SBS-PEG gel

Figure S1 demonstrates the peaks related to the asymmetrical (at 2920 cm<sup>-1</sup>) and stretching (at 3006 cm<sup>-1</sup>) vibrations of =CH<sub>2</sub> groups in pendant vinyl double bonds of butadiene. Decreases in the peaks at 2920 cm<sup>-1</sup> were observed in SBS gel and SBS-PEG gel groups compared to

that of SBS membrane and SBS membrane-PEG groups. This result could be attributed to the saturation of vinyl groups in the SBS structure in crosslinked SBS and SBS-PEG gels samples.

The peak at  $1639\text{ cm}^{-1}$  can be assigned to stretching vibrations of (C=C) in vinyl-vinyl-polybutadiene groups. Decreases in this peak in SBS gel and SBS-PEG gels could be attributed to the consumption of these double bonds in SBS upon crosslinking. The peaks at the  $1580\text{ cm}^{-1}$  and  $1602\text{ cm}^{-1}$  were assigned to stretching vibrations of the carbons in the aromatic rings where these peaks disappeared in crosslinked SBS and SBS-PEG gel networks as a result of the formation of a stable network. This analysis confirms the successful cross-linking of SBS polymer both in SBS and SBS-PEG gels.

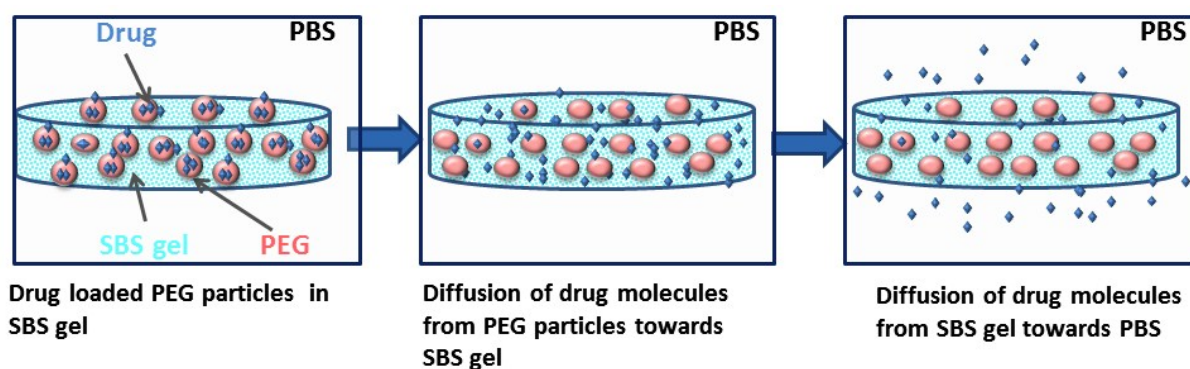

Figure S2. Possible diffusion process/mechanism for the release of the P2X7 from SBS-PEG gels towards PBS.

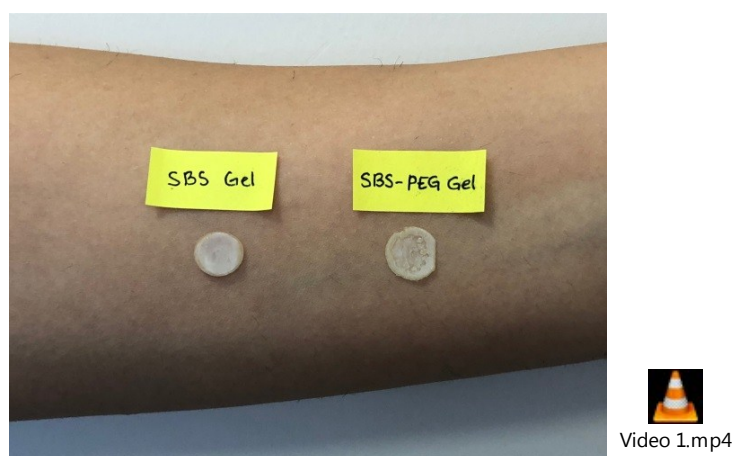

Figure S3. Adhesion and biocompatibility experiment of SBS gel and SBS-PEG gel on human skin.
